# Supplementary material for: Non-Invasive Biomarkers for Duchenne Muscular Dystrophy and Carrier Detection
Source: PubMed Central journal article supplement (PMC6272409; doi:10.3390/molecules200611154), 2015-06-17
Supplement: molecules-20-11154-s001.pdf [file molecules-20-11154-s001.pdf]

## Supplementary Materials

**Table S1.** Clinical parameters of DMD steroid naïve ambulant patients.

| Patient          | Mutation           | Age (Years) | NSAA | 6 MW | Barthel | Brook U | Brook L | Vignos | T10mw | T10mr | Gowers | Stair | Chair | Shirt |
|------------------|--------------------|-------------|------|------|---------|---------|---------|--------|-------|-------|--------|-------|-------|-------|
| P1               | c.6439-?_7660+?del | 3.1         | 18   | -    | -       | 1       | 3       | 2      | -     | -     | -      | -     | -     | -     |
| P2               | dystrophin IMF     | 5.6         | 27   | -    | -       | 1       | 2       | 2      | -     | 0.72  | 4.75   | 4.96  | 1.35  | 18    |
| P3               | c.7661-?_8217+?del | 6.2         | 18   | 330  | 85      | 1       | 2       | 3      | 0.8   | 1.07  | 11     | 56    | 3     | 16    |
| P4               | c.6439-?_6614+?del | 6.5         | 10   | 415  | 95      | 1       | 2       | 2      | 0.6   | 1.3   | 10     | 5     | 3     | 11    |
| P5               | c.6615-?_7200+?del | 6.9         | -    | -    | 90      | 1       | 3       | 3      | 0.6   | 1.3   | 26     | 14    | 1     | 17    |
| P6               | dystrophin IMF     | 6.9         | 13   | 286  | 80      | 1       | 3       | 2      | -     | 0.73  | NA     | 9.7   | 2.7   | 11.1  |
| P7               | c.265-?_530+?del   | 7           | -    | -    | -       | -       | -       | -      | -     | -     | -      | -     | -     | -     |
| P8               | c.6913-?_7660+?del | 7.4         | 0    | -    | 55      | 1       | 3       | 0.4    | 0.6   | NA    | 44     | 10    | 35    | 0     |
| P9               | c.5326-?_5448+?dup | 7.5         | 14   | 342  | 90      | 1       | 3       | 3      | 0.9   | 1.3   | 7      | 5     | 2     | 13    |
| P10              | c.6615-?_7660+?del | 7.8         | 17   | 288  | -       | 1       | 2       | 2      | -     | 0.8   | 7      | 6     | 1     | 9     |
| P11              | c.6615-?_7872+?del | 7.8         | 20   | 275  | -       | 1       | 2       | 2      | -     | 1.1   | 15     | -     | 2     | 7     |
| P12              | c.32-?_93+?dup     | 7.9         | 13   | 320  | 95      | 1       | 3       | 3      | 0.8   | 1.5   | 13     | 6     | 3     | 20    |
| P13              | c.32-?_93+?dup     | 8           | -    | 224  | 70      | 1       | 3       | 3      | 0.6   | 0.7   | NA     | 27    | 3     | 27    |
| P14              | c.6439-?_6614+?del | 8.2         | 12   | 279  | 95      | 1       | 3       | 3      | 0.9   | 1.5   | 9      | 271   | 2     | 19    |
| P15              | c.6439-?_7660+?del | 8.3         | 11   | 343  | 90      | 1       | 3       | 3      | 0.8   | 1.1   | 32     | 15    | 4     | 18    |
| P16              | c.6439-?_8027+?del | 8.3         | -    | -    | -       | 3       | 3       | -      | -     | -     | 14     | -     | 1     | -     |
| P17              | dystrophin IMF     | 8.8         | 13   | 286  | -       | 1       | 1       | 2      | -     | 0.73  | NA     | 9.7   | 2.7   | 11.1  |
| P18              | c.7099-?_7309+?del | 10.2        | -    | -    | -       | 9       | 3       | 7      | -     | 0.6   | NA     | NA    | -     | -     |
| P19              | dystrophin IMF     | 7.0         | -    | -    | -       | -       | -       | -      | -     | -     | -      | -     | -     | -     |
| P20              | c.6439-?_8390+?del | 10.5        | 17   | 288  | -       | 1       | 2       | 2      | -     | 0.8   | 7      | 6     | 1     | 9     |
| P21              | c.5923-?_6290+?del | 10.6        | -    | -    | 90      | 1       | 3       | 3      | 0.7   | 1.07  | 6      | 6     | 2     | 11    |
| P22              | dystrophin IMF     | 10.7        | 8    | 114  | 85      | 1       | 3       | 3      | 0.7   | 0.9   | NA     | 15    | 4     | 10    |
| P23 <sup>‡</sup> | dystrophin IMF     | 10.7        | 27   | 130  | 90      | 1       | 2       | 2      | NA    | 0.1   | 13     | NA    | 2     | 7     |
| P24              | c.6439-?_7660+?del | 11.7        | -    | -    | 50      | 2       | 5       | 5      | 0.2   | 0.2   | 84     | NA    | NA    | 25    |
| P25              | dystrophin IMF     | 12          | -    | -    | -       | 1       | 2       | 2      | -     | -     | 6      | -     | -     | -     |

<sup>‡</sup>P23 was taken into account only in correlation between MMP-9 serum levels, clinical parameters and age.

**Table S2.** Comparison of protein serum levels in LGMD groups matched by gender and age, respectively.

| Protein | LGMD (Male)                            |                                        |                | LGMD (Female)                          |                                         |                |
|---------|----------------------------------------|----------------------------------------|----------------|----------------------------------------|-----------------------------------------|----------------|
|         | Patients <i>n</i> = 3 Mean ( $\pm$ SD) | Controls <i>n</i> = 4 Mean ( $\pm$ SD) | <i>P</i> Value | Patients <i>n</i> = 4 Mean ( $\pm$ SD) | Controls <i>n</i> = 17 Mean ( $\pm$ SD) | <i>P</i> value |
| MMP-9   | 517.00 (318.5)                         | 165.3 (114.18)                         | 0.090          | 707.05 (333.07)                        | 705.76 (550.15)                         | 0.994          |
| MMP-2   | 241.55 (68.51)                         | 519.83 (112.33)                        | 0.013 *        | ND                                     | ND                                      | ND             |
| FSTN    | 1.686 (0.528)                          | 0.715 (0.1521)                         | 0.016 *        | 1.577 (0.974)                          | <sup>¶</sup> 1.830 (0.491)              | 0.519          |

\* denotes statistical significance, <sup>¶</sup> *n* = 9, ND = Non determined.

**Scatterplot by control group**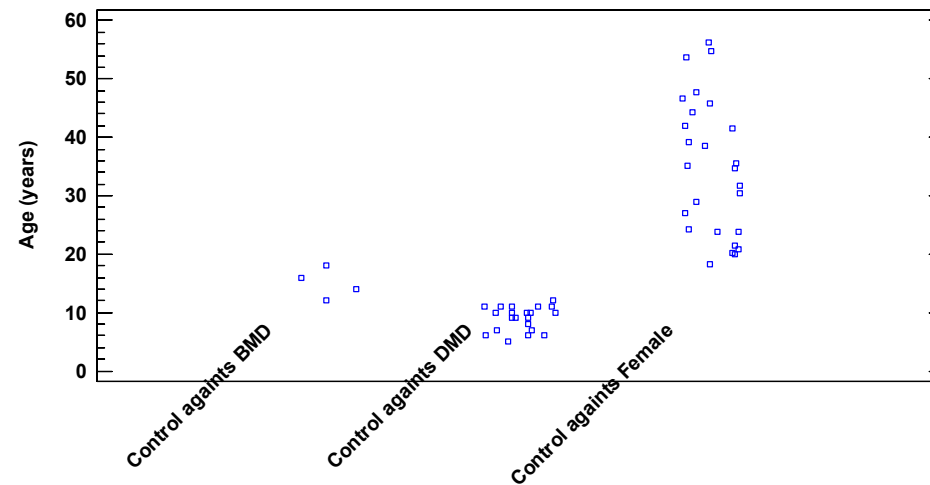**Figure S1.** Dot Plot of age by controls used against DMD, BMD and carriers.
